# Supplementary material for: The first global deep-sea stable isotope assessment reveals the unique trophic ecology of Vampire Squid Vampyroteuthis infernalis (Cephalopoda)
Source: PubMed Central journal article supplement (PMC6910912; doi:10.1038/s41598-019-55719-1), 2019-12-13
Supplement: 41598_2019_55719_MOESM1_ESM.pdf [file 41598_2019_55719_MOESM1_ESM.pdf]

Supplementary materials for the article

**The first global deep-sea stable isotope assessment reveals the unique trophic ecology of Vampire Squid *Vampyroteuthis infernalis* (Cephalopoda)**

Alexey V. Golikov\*, Filipe R. Ceia, Rushan M. Sabirov, Jonathan D. Ablett, Ian G. Gleadall, Gudmundur Gudmundsson, Hendrik J. Hoving, Heather Judkins, Jónbjörn Pálsson, Amanda L. Reid, Rigoberto Rosas-Luis, Elizabeth K. Shea, Richard Schwarz & José C. Xavier

\*Corresponding author: golikov\_ksu@mail.ru

Supplementary Table 1. Biometric measurements (ML, mantle length; LHL and UHL, lower and upper hood length), ontogenetic stage, stable isotope values of lower beaks ( $\delta^{13}\text{C}$  and  $\delta^{15}\text{N}$ ) and estimated trophic level (TL) and collection area information for all specimens of *Vampyroteuthis infernalis* used in this study

| Number   | Ocean    | Depth, m <sup>1</sup> | Oxygenation conditions <sup>2</sup> | Specimen condition | ML, mm (accepted) <sup>3</sup> | Stage     | LHL, mm | UHL, mm | $\delta^{13}\text{C}$ , ‰ <sup>4</sup> | $\delta^{15}\text{N}$ , ‰ <sup>4</sup> | TL  |
|----------|----------|-----------------------|-------------------------------------|--------------------|--------------------------------|-----------|---------|---------|----------------------------------------|----------------------------------------|-----|
| PS0722-1 | Atlantic | 1400.0                | Normal                              | Fixed <sup>5</sup> | 19                             | Paralarva | –       | 6.53    | –18.9                                  | 7.3                                    | 3.7 |
| PS0722-2 | Atlantic | 1400.0                | Normal                              | Fixed <sup>5</sup> | 24                             | Paralarva | –       | 6.09    | –17.8                                  | 7.7                                    | 3.9 |
| PS0722-3 | Atlantic | 1400.0                | Normal                              | Fixed <sup>5</sup> | 23                             | Paralarva | –       | 7.16    | –18.4                                  | 7.1                                    | 3.7 |
| PS0765-3 | Atlantic | 700.0                 | Normal                              | Fixed <sup>5</sup> | 20                             | Paralarva | –       | 5.72    | –20.3                                  | 8.1                                    | 4.0 |
| PS1466-2 | Atlantic | 1355.0                | Normal                              | Fixed <sup>5</sup> | 17                             | Paralarva | –       | 4.02    | –18.8                                  | 7.4                                    | 3.8 |
| PS1466-3 | Atlantic | 1355.0                | Normal                              | Fixed <sup>5</sup> | 15                             | Paralarva | –       | 3.68    | –18.4                                  | 8.5                                    | 4.1 |
| PS2132-3 | Atlantic | 1439.0                | Normal                              | Fixed <sup>5</sup> | 14                             | Paralarva | –       | 4.23    | –18.2                                  | 8.5                                    | 4.1 |
| PS2132-4 | Atlantic | 1439.0                | Normal                              | Fixed <sup>5</sup> | 21                             | Paralarva | –       | 6.68    | –19.4                                  | 7.1                                    | 3.7 |
| PS2598-3 | Atlantic | 1395.0                | Normal                              | Fixed <sup>5</sup> | 22                             | Paralarva | –       | 4.83    | –18.5                                  | 7.7                                    | 3.9 |
| PS2598-4 | Atlantic | 1395.0                | Normal                              | Fixed <sup>5</sup> | 23                             | Paralarva | 3.54    | 5.18    | –18.4                                  | 7.4                                    | 3.8 |
| PS2425-2 | Atlantic | 1327.0                | Normal                              | Fixed <sup>5</sup> | 11                             | Paralarva | 2.63    | 3.95    | –18.4                                  | 8.7                                    | 4.2 |
| PS0765-2 | Atlantic | 700.0                 | Normal                              | Fixed <sup>5</sup> | 40                             | Small     | –       | 6.87    | –18.8                                  | 7.2                                    | 3.7 |
| PS1448-1 | Atlantic | 1437.0                | Normal                              | Fixed <sup>5</sup> | 49                             | Small     | –       | 6.17    | –19.3                                  | 5.9                                    | 3.3 |
| PS1448-2 | Atlantic | 1437.0                | Normal                              | Fixed <sup>5</sup> | 27                             | Small     | –       | 5.01    | –18.5                                  | 8.7                                    | 4.2 |
| PS1466-1 | Atlantic | 1355.0                | Normal                              | Fixed <sup>5</sup> | 42                             | Small     | –       | 6.1     | –18.1                                  | 8.4                                    | 4.1 |
| PS2132-1 | Atlantic | 1439.0                | Normal                              | Fixed <sup>5</sup> | 42                             | Small     | –       | 6.85    | –18.5                                  | 7.5                                    | 3.8 |

|                 |          |        |        |                     |     |           |      |       |       |      |     |
|-----------------|----------|--------|--------|---------------------|-----|-----------|------|-------|-------|------|-----|
| PS2132-2        | Atlantic | 1439.0 | Normal | Fixed <sup>5</sup>  | 33  | Small     | –    | 7.13  | –18.7 | 7.5  | 3.8 |
| PS1600-1        | Atlantic | 1418.0 | Normal | Fixed <sup>5</sup>  | 36  | Small     | –    | 6.82  | –18.6 | 6.4  | 3.5 |
| PS1600-2        | Atlantic | 1418.0 | Normal | Fixed <sup>5</sup>  | 40  | Small     | –    | 9.82  | –19.6 | 6.5  | 3.5 |
| PS1600-3        | Atlantic | 1418.0 | Normal | Fixed <sup>5</sup>  | 39  | Small     | –    | 10.82 | –18.2 | 6.6  | 3.5 |
| PS1334-1        | Atlantic | 1271.0 | Normal | Fixed <sup>5</sup>  | 31  | Small     | –    | 7.4   | –18.5 | 7.5  | 3.8 |
| PS1291-1        | Atlantic | 1448.0 | Normal | Fixed <sup>5</sup>  | 31  | Small     | –    | 4.87  | –18.4 | 9.2  | 4.3 |
| PS1358-1        | Atlantic | 1143.0 | Normal | Fixed <sup>5</sup>  | 51  | Small     | –    | 8.26  | –19.2 | 6.8  | 3.6 |
| PS0765-1        | Atlantic | 700.0  | Normal | Fixed <sup>5</sup>  | 77  | Medium    | –    | 9.35  | –18.9 | 7.2  | 3.7 |
| PS1902-1        | Atlantic | 724.0  | Normal | Fixed <sup>5</sup>  | 93  | Medium    | –    | 12.53 | –18.9 | 6.2  | 3.4 |
| PS1334-2        | Atlantic | 1271.0 | Normal | Fixed <sup>5</sup>  | 66  | Medium    | –    | 6.82  | –18.8 | 8.0  | 4.0 |
| PS1291-2        | Atlantic | 1448.0 | Normal | Fixed <sup>5</sup>  | 77  | Medium    | –    | 8.62  | –18.7 | 7.3  | 3.8 |
| PS2383-1        | Atlantic | 1319.0 | Normal | Fixed <sup>5</sup>  | 66  | Medium    | –    | 13.31 | –19.1 | 5.9  | 3.3 |
| PS2406-1        | Atlantic | 1417.0 | Normal | Fixed <sup>5</sup>  | 69  | Medium    | –    | 11.92 | –18.3 | 5.9  | 3.4 |
| PS2598-1        | Atlantic | 1395.0 | Normal | Fixed <sup>5</sup>  | 82  | Medium    | –    | 13.31 | –18.8 | 6.8  | 3.6 |
| PS2598-2        | Atlantic | 1395.0 | Normal | Fixed <sup>5</sup>  | 79  | Medium    | –    | 9.85  | –19.1 | 6.6  | 3.6 |
| PS2425-1        | Atlantic | 1327.0 | Normal | Fixed <sup>5</sup>  | 84  | Medium    | –    | 13.85 | –17.9 | 6.5  | 3.5 |
| TEM2007-768-21  | Atlantic | 792.0  | Normal | Fixed <sup>6</sup>  | 18  | Paralarva | 3.45 | –     | –17.5 | 9.4  | 3.9 |
| TEM2007-768-58  | Atlantic | 250.0  | Normal | Fixed <sup>6</sup>  | 17  | Paralarva | 3.48 | –     | –16.7 | 9.7  | 4.0 |
| TEM2007-768-64  | Atlantic | 1000.0 | Normal | Fixed <sup>6</sup>  | 22  | Paralarva | 2.61 | 3.87  | –17.0 | 10.0 | 4.1 |
| TEL2010-900-40  | Atlantic | 750.0  | Normal | Fixed <sup>6</sup>  | 25  | Paralarva | 2.9  | 4.03  | –17.4 | 9.3  | 3.9 |
| TEM2007-768-8   | Atlantic | 1195.0 | Normal | Fixed <sup>6</sup>  | 53  | Small     | 5.3  | –     | –17.9 | 9.4  | 3.9 |
| NED2009-035-32  | Atlantic | 1750.0 | Normal | Fixed <sup>6</sup>  | 40  | Small     | 4.72 | –     | –17.0 | 9.4  | 3.9 |
| NED2009-035-46  | Atlantic | 1250.0 | Normal | Fixed <sup>6</sup>  | 38  | Small     | 4.66 | –     | –17.8 | 9.2  | 3.9 |
| TEM2007-768-13  | Atlantic | 1694.0 | Normal | Fixed <sup>6</sup>  | 88  | Medium    | 7.28 | –     | –17.9 | 7.8  | 3.5 |
| TEL2010-900-17  | Atlantic | 250.0  | Normal | Fixed <sup>6</sup>  | 84  | Medium    | 5.85 | –     | –17.6 | 8.2  | 3.6 |
| TEL2010-900-55  | Atlantic | 1337.0 | Normal | Fixed <sup>6</sup>  | 105 | Large     | 7.44 | –     | –17.3 | 9.0  | 3.8 |
| A11-2016-355(1) | Atlantic | 775.0  | Normal | Fixed <sup>7</sup>  | 63  | Small     | 5.9  | 7.2   | –17.5 | 9.2  | 3.9 |
| 675             | Atlantic | 800.0  | OMZ    | Frozen <sup>8</sup> | 9   | Paralarva | 1.31 | 2.87  | –18.0 | 9.8  | 3.9 |
| D10379-19       | Atlantic | –      | Normal | Fixed <sup>9</sup>  | 6   | Paralarva | 0.92 | 1.36  | –20.3 | 10.1 | 4.0 |
| 20150263        | Atlantic | –      | OMZ    | Fixed <sup>9</sup>  | 24  | Paralarva | 2.9  | 4.4   | –16.5 | 11.1 | 4.3 |
| 12183-10        | Atlantic | –      | OMZ    | Fixed <sup>9</sup>  | 25  | Paralarva | 2.98 | 3.95  | –17.3 | 10.7 | 4.2 |
| D6622-16        | Atlantic | –      | OMZ    | Fixed <sup>9</sup>  | 13  | Paralarva | 1.18 | 2.88  | –20.7 | 9.4  | 3.8 |
| D7089-08        | Atlantic | –      | OMZ    | Fixed <sup>9</sup>  | 15  | Paralarva | 1.98 | 3.81  | –18.3 | 7.7  | 3.3 |
| D9541-30        | Atlantic | –      | OMZ    | Fixed <sup>9</sup>  | 7   | Paralarva | 1.1  | 2.02  | –17.8 | 11.6 | 4.3 |

|             |          |       |        |                     |     |           |       |       |       |      |     |
|-------------|----------|-------|--------|---------------------|-----|-----------|-------|-------|-------|------|-----|
| 20150264    | Atlantic | –     | OMZ    | Fixed <sup>9</sup>  | 9   | Paralarva | 1.29  | 1.92  | –17.5 | 10.5 | 4.1 |
| 20150261    | Atlantic | –     | OMZ    | Fixed <sup>9</sup>  | 16  | Paralarva | 2.1   | 3.1   | –17.8 | 11.8 | 4.3 |
| D7803-2     | Atlantic | –     | OMZ    | Fixed <sup>9</sup>  | 12  | Paralarva | 1.68  | 3     | –17.1 | 10.1 | 4.0 |
| D7824-34    | Atlantic | –     | OMZ    | Fixed <sup>9</sup>  | 26  | Paralarva | –     | 4.81  | –18.5 | 8.6  | 3.8 |
| D8553-2     | Atlantic | –     | OLZ    | Fixed <sup>9</sup>  | 26  | Paralarva | 3.06  | 4.17  | –18.1 | 10.2 | 3.9 |
| 12          | Atlantic | 490.0 | OLZ    | Frozen <sup>8</sup> | 33  | Small     | 3.71  | 6.11  | –17.9 | 7.4  | 3.0 |
| 676         | Atlantic | 800.0 | OLZ    | Frozen <sup>8</sup> | 37  | Small     | 4     | 7.68  | –17.5 | 9.7  | 3.9 |
| D8558-1B    | Atlantic | –     | OLZ    | Fixed <sup>9</sup>  | 27  | Small     | 3.13  | 3.31  | –18.1 | 9.6  | 3.7 |
| 677         | Atlantic | 800.0 | OLZ    | Frozen <sup>8</sup> | 104 | Medium    | 9.01  | 12.9  | –17.8 | 8.6  | 3.8 |
| D10378-24   | Atlantic | –     | Normal | Fixed <sup>9</sup>  | 87  | Medium    | 7.81  | 10.04 | –18.3 | 8.1  | 3.6 |
| D7803-11    | Atlantic | –     | OMZ    | Fixed <sup>9</sup>  | 89  | Medium    | 7.97  | 10.79 | –17.4 | 8.4  | 3.5 |
| D7824-19    | Atlantic | –     | OMZ    | Fixed <sup>9</sup>  | 70  | Medium    | 6.59  | 8.39  | –18.4 | 8.0  | 3.7 |
| D7824-2     | Atlantic | –     | OMZ    | Fixed <sup>9</sup>  | 74  | Medium    | 6.86  | 8.92  | –18.0 | 6.6  | 3.3 |
| D7089-5     | Atlantic | –     | OMZ    | Fixed <sup>9</sup>  | 133 | Large     | 10.87 | 14.93 | –16.6 | 8.6  | 3.5 |
| D7803-31    | Atlantic | –     | OMZ    | Fixed <sup>9</sup>  | 128 | Large     | 10.56 | 13.89 | –16.3 | 9.3  | 4.2 |
| D85262-6    | Atlantic | –     | OLZ    | Fixed <sup>9</sup>  | 120 | Large     | 10.04 | 14.32 | –17.5 | 7.8  | 3.2 |
| D1739       | Indian   | –     | Normal | Fixed <sup>9</sup>  | 62  | Small     | 5.97  | 8.22  | –16.5 | 11.2 | 3.4 |
| D5332       | Indian   | –     | Normal | Fixed <sup>9</sup>  | 59  | Small     | 5.79  | 6.76  | –18.2 | 10.0 | 3.8 |
| SA-1        | Indian   | –     | Normal | Whale <sup>10</sup> | 134 | Large     | 10.93 | –     | –17.4 | 9.2  | 4.0 |
| SA-2        | Indian   | –     | Normal | Whale <sup>10</sup> | 145 | Large     | 11.62 | –     | –17.9 | 8.8  | 3.9 |
| AM C.451587 | Pacific  | 660.0 | Normal | Fixed <sup>11</sup> | 61  | Small     | 5.96  | –     | –18.5 | 9.1  | 3.2 |
| AM C.154223 | Pacific  | 640.0 | Normal | Fixed <sup>11</sup> | 73  | Medium    | 6.83  | –     | –18.6 | 9.1  | 3.3 |
| AM C.450195 | Pacific  | 800.0 | Normal | Fixed <sup>11</sup> | 69  | Medium    | 6.5   | –     | –18.7 | 9.7  | 3.4 |
| AM C.451584 | Pacific  | 640.0 | Normal | Fixed <sup>11</sup> | 126 | Large     | 10.43 | –     | –18.0 | 8.6  | 3.1 |
| AM C.451586 | Pacific  | 485.0 | Normal | Fixed <sup>11</sup> | 152 | Large     | 12.04 | –     | –18.6 | 8.8  | 3.2 |
| J-1         | Pacific  | –     | Normal | Bird <sup>12</sup>  | 124 | Large     | 10.3  | –     | –19.6 | 8.1  | 3.2 |
| P-8         | Pacific  | –     | OMZ    | Whale <sup>10</sup> | 101 | Medium    | 8.77  | –     | –17.3 | 13.2 | 3.3 |
| P-1         | Pacific  | –     | OMZ    | Whale <sup>10</sup> | 138 | Large     | 11.14 | –     | –17.0 | 14.9 | 3.8 |
| P-2         | Pacific  | –     | OMZ    | Whale <sup>10</sup> | 134 | Large     | 10.9  | –     | –16.4 | 13.1 | 3.3 |
| P-3         | Pacific  | –     | OMZ    | Whale <sup>10</sup> | 134 | Large     | 10.93 | –     | –16.5 | 16.1 | 4.1 |
| P-4         | Pacific  | –     | OMZ    | Whale <sup>10</sup> | 132 | Large     | 10.78 | –     | –16.4 | 15.2 | 3.9 |
| P-5         | Pacific  | –     | OMZ    | Whale <sup>10</sup> | 138 | Large     | 11.15 | –     | –16.9 | 15.8 | 4.0 |
| P-6         | Pacific  | –     | OMZ    | Whale <sup>10</sup> | 124 | Large     | 10.29 | –     | –16.6 | 12.9 | 3.2 |
| P-7         | Pacific  | –     | OMZ    | Whale <sup>10</sup> | 139 | Large     | 11.25 | –     | –16.4 | 12.8 | 3.2 |

|      |         |       |     |                     |     |        |       |       |       |      |     |
|------|---------|-------|-----|---------------------|-----|--------|-------|-------|-------|------|-----|
| P-9  | Pacific | –     | OMZ | Whale <sup>10</sup> | 155 | Large  | 12.21 | –     | –16.6 | 8.2  | 3.0 |
| P-10 | Pacific | –     | OMZ | Whale <sup>10</sup> | 198 | Large  | 14.79 | –     | –15.8 | 10.6 | 3.7 |
| R-1  | Pacific | –     | OMZ | Shark <sup>13</sup> | 96  | Medium | 8.4   | –     | –16.1 | 8.4  | 3.4 |
| R-6  | Pacific | –     | OMZ | Shark <sup>13</sup> | 80  | Medium | –     | 12.03 | –15.9 | 8.8  | 3.4 |
| R-7  | Pacific | –     | OMZ | Shark <sup>13</sup> | 85  | Medium | –     | 12.73 | –16.3 | 7.4  | 3.0 |
| R-2  | Pacific | –     | OMZ | Shark <sup>13</sup> | 110 | Large  | 9.37  | –     | –16.8 | 8.6  | 3.4 |
| R-3  | Pacific | –     | OMZ | Shark <sup>13</sup> | 170 | Large  | 13.12 | –     | –17.5 | 11.0 | 4.1 |
| R-4  | Pacific | –     | OMZ | Shark <sup>13</sup> | 130 | Large  | 10.67 | –     | –16.9 | 7.5  | 3.1 |
| R-5  | Pacific | –     | OMZ | Shark <sup>13</sup> | 113 | Large  | 9.56  | –     | –16.1 | 7.1  | 3.0 |
| 549  | Pacific | 652.8 | OMZ | Frozen <sup>8</sup> | 27  | Small  | 3.16  | 5.2   | –17.9 | 14.6 | 4.1 |
| 563  | Pacific | –     | OMZ | Frozen <sup>8</sup> | 49  | Small  | 5.02  | 8.43  | –18.2 | 12.9 | 4.2 |
| 576  | Pacific | –     | OMZ | Frozen <sup>8</sup> | 73  | Medium | 6.82  | 8.84  | –17.3 | 13.5 | 4.3 |
| 531  | Pacific | –     | OMZ | Frozen <sup>8</sup> | 66  | Medium | 6.27  | 13.21 | –17.6 | 13.0 | 4.2 |
| 572  | Pacific | –     | OMZ | Frozen <sup>8</sup> | 92  | Medium | 8.18  | 12.75 | –16.6 | 13.1 | 4.1 |
| 553  | Pacific | 581.3 | OMZ | Frozen <sup>8</sup> | 79  | Medium | 7.23  | 12.55 | –16.4 | 13.5 | 4.2 |
| 569  | Pacific | –     | OMZ | Frozen <sup>8</sup> | 110 | Large  | 9.39  | 13.73 | –17.9 | 12.5 | 4.1 |
| 561  | Pacific | –     | OMZ | Frozen <sup>8</sup> | 111 | Large  | 9.43  | 15.95 | –16.5 | 13.0 | 4.2 |
| 540  | Pacific | –     | OMZ | Frozen <sup>8</sup> | 112 | Large  | 9.51  | 15.6  | –16.9 | 13.2 | 4.3 |
| 533  | Pacific | –     | OMZ | Frozen <sup>8</sup> | 116 | Large  | 9.75  | 16.6  | –16.1 | 13.6 | 4.3 |
| 550  | Pacific | 745.7 | OMZ | Fixed <sup>8</sup>  | 124 | Large  | 10.29 | 15.65 | –16.6 | 13.5 | 4.2 |

<sup>1</sup> depth of capture was estimated as mean value between net opening and net closing, if both were available (see Methods);

<sup>2</sup> oxygen conditions were classified as oxygen minimum zone (OMZ), oxygen limited zone (OLZ) and ‘normal’ (Normal) (see Methods);

<sup>3</sup> accepted ML: the accepted ML was estimated from LHL or UHL for beaks with no measured ML or no reliably measured ML (see Methods);

<sup>4</sup>  $\delta^{13}\text{C}$  and  $\delta^{15}\text{N}$ : for samples where only upper beaks were available, stable isotope values of lower beaks were estimated by highly significant equations relating upper and lower beaks derived from specimens where both beaks were analyzed (see Methods);

<sup>5</sup> fixed specimens vouchered in Department of Biological Sciences, University of South Florida St. Petersburg;

<sup>6</sup> fixed specimens vouchered in Delaware Museum of Natural History (Wilmington);

<sup>7</sup> fixed specimen vouchered in Collections and Systematics Department, Icelandic Institute of Natural History (Gardabaer). Northernmost record of species distribution;

<sup>8</sup> fixed or frozen specimens vouchered in GEOMAR, Helmholtz Centre for Ocean Research Kiel;

<sup>9</sup> fixed specimens vouchered in Department of Life Sciences, Natural History Museum (London);

<sup>10</sup> beaks from predator stomach contents: stomach of sperm whales, *Physeter macrocephalus* (Clarke 1980);

<sup>11</sup> fixed specimens vouchered in the Australian Museum (Sydney);

<sup>12</sup> beak from predator stomach contents: stomach of Antipodean wandering albatrosses, *Diomedea antipodensis antipodensis* (Xavier et al. 2014);

<sup>13</sup> beaks from predator stomach contents: stomach of blue sharks, *Prionace glauca* (Loor-Andrade et al. 2017).

#### Cited literature:

Clarke, M. R. Cephalopoda in the diet of sperm whales of the southern hemisphere and their bearing on sperm whale biology. *Discovery Rep.* **37**, 1–324 (1980).

Loor-Andrade, P., Pincay-Espinoza, J. & Rosas-Luis, R. Diet of the blue shark *Prionace glauca* in the Ecuadorian Pacific Ocean during the years 2013 to 2015. *J. Appl. Ichthyol.* **33**, 558–562 (2017).

Xavier, J. C., Walker, K., Elliott, G., Cherel, Y. & Thompson, T. Cephalopod fauna of South Pacific waters: new information from breeding New Zealand wandering albatrosses. *Mar. Ecol. Prog. Ser.* **513**, 131–142 (2014).

Supplementary Table 2. Known stomach contents and observations of feeding of *Vampyroteuthis infernalis*.

| Phylum     | Class                        | Species                             | Organism composition      | Observation mode          | Area                                    | Reference             |
|------------|------------------------------|-------------------------------------|---------------------------|---------------------------|-----------------------------------------|-----------------------|
| –          | –                            | –                                   | Detritus                  | Stomach contents analysis | Monterey Bay                            | Hoving & Robison 2012 |
|            |                              |                                     |                           | ROV observations          | Monterey Bay                            | Hoving & Robison 2012 |
| Ochrophyta | Bacillariophyceae            | Various                             | Whole and fragments       | Stomach contents analysis | San Pedro Basin off southern California | Young 1977            |
|            |                              |                                     |                           |                           | Monterey Bay                            | Hoving & Robison 2012 |
| Retaria    | Radiolaria                   | Various                             | Whole and fragments       | Stomach contents analysis | San Pedro Basin off southern California | Young 1977            |
|            |                              |                                     |                           |                           | Monterey Bay                            | Hoving & Robison 2012 |
| Ciliophora | Not stated                   | Various                             | Whole and fragments       | Stomach contents analysis | Monterey Bay                            | Hoving & Robison 2012 |
| Cnidaria   | Not stated                   | Hydrozoan or/and scyphozoan medusae | Fragments                 | Stomach contents analysis | Monterey Bay                            | Hoving & Robison 2012 |
| Ctenophora | Not stated                   | Various                             | Fragments                 | Stomach contents analysis | Monterey Bay                            | Hoving & Robison 2012 |
| Arthropoda | Not stated                   | Crustacean larvae                   | Whole and fragments       | Stomach contents analysis | San Pedro Basin off southern California | Young 1977            |
|            |                              | Small non-larval crustaceans        | Fragments                 | Stomach contents analysis | San Pedro Basin off southern California | Young 1977            |
|            |                              |                                     |                           |                           | Monterey Bay                            | Hoving & Robison 2012 |
|            | Large non-larval crustaceans | Fragments                           | Stomach contents analysis | Monterey Bay              | Hoving & Robison 2012                   |                       |
|            | Ostracoda                    | Various                             | Whole and fragments       | Stomach contents analysis | Monterey Bay                            | Hoving & Robison 2012 |

|          |              |                                 |                                                                 |                                          |                                            |                       |
|----------|--------------|---------------------------------|-----------------------------------------------------------------|------------------------------------------|--------------------------------------------|-----------------------|
|          | Maxillopoda  | Copepods                        | Whole, fragments and fecal pellets                              | Stomach contents analysis                | San Pedro Basin off southern California    | Young 1977            |
|          |              |                                 |                                                                 |                                          | Monterey Bay                               | Hoving & Robison 2012 |
|          | Malacostraca | Amphopods                       | Whole and fragments                                             | Stomach contents analysis                | Monterey Bay                               | Hoving & Robison 2012 |
| Mollusca | Cephalopoda  | <i>Histioteuthis heteropsis</i> | Whole squid, attacked and ingested <sup>1</sup>                 | Direct observation of feeding in aquaria | San Clemente Basin off southern California | Siebel, pers. comm.   |
|          |              | <i>Gonatopsis borealis</i>      | Fragments                                                       | Stomach contents analysis                | Monterey Bay                               | Hoving & Robison 2012 |
| Chordata | Larvacea     | Different species               | Faecal pellets, fragments and discarded mucus filtration houses | Stomach contents analysis                | Monterey Bay                               | Hoving & Robison 2012 |
|          |              | <i>Bathocordaews</i> sp.        | Discarded mucus filtration houses                               | Stomach contents analysis                | Monterey Bay                               | Hoving & Robison 2012 |
|          | Thaliacea    | <i>Doliolum</i> sp.             | Fragments and discarded mucus filtration houses                 | Stomach contents analysis                | Monterey Bay                               | Hoving & Robison 2012 |
|          | Osteichthyes | Unidentified                    | Scales and bones                                                | Stomach contents analysis                | Monterey Bay                               | Hoving & Robison 2012 |

<sup>1</sup> clearly not a typical feeding behavior, as stated by author of the observation.

Cited literature:

Young, J. Z. Brain, behaviour and evolution of cephalopods. *Symp. Zool. Soc. Lond.* **38**, 377–434 (1977).

Hoving, H. J. T. & Robison, B. H. Vampire squid: detritivores in the oxygen minimum zone. *Proc. R. Soc. Ser. B – Bio.* **279**, 4559–4567 (2012).

Supplementary Table 3. Mantle length (ML), values of  $\delta^{13}\text{C}$  and  $\delta^{15}\text{N}$  and estimated trophic level (TL) in *Vampyroteuthis infernalis* from different oxygenation conditions: oxygen minimum zones (OMZ), oxygen limited zones (OLZ) and ‘normal’ (Normal) (see Methods for  $\text{O}_2$  concentrations).

Values are minimum – maximum (mean  $\pm$  standard error)

| Stage      | All specimens, OMZ                   |                              |                                   |                               |                              | All specimens, OLZ <sup>1</sup> |                              |                                   |                              |                            |
|------------|--------------------------------------|------------------------------|-----------------------------------|-------------------------------|------------------------------|---------------------------------|------------------------------|-----------------------------------|------------------------------|----------------------------|
|            | n                                    | ML, mm                       | $\delta^{13}\text{C}$ , ‰         | $\delta^{15}\text{N}$ , ‰     | TL                           | n                               | ML, mm                       | $\delta^{13}\text{C}$ , ‰         | $\delta^{15}\text{N}$ , ‰    | TL                         |
| All        | 43                                   | 7–198<br>(88.1 $\pm$ 7.8)    | –20.7– –15.8<br>(–17.1 $\pm$ 0.1) | 6.6–16.1<br>(11.2 $\pm$ 0.4)  | 3.0–4.3<br>(3.8 $\pm$ 0.1)   | 6                               | 26–120<br>(57.9 $\pm$ 17.4)  | –18.1– –17.5<br>(–17.8 $\pm$ 0.1) | 7.4–10.2<br>(8.9 $\pm$ 0.5)  | 3.0–3.9<br>(3.6 $\pm$ 0.2) |
| Paralarvae | 10                                   | 7–26<br>(15.5 $\pm$ 2.3)     | –20.7– –16.5<br>(–17.9 $\pm$ 0.4) | 7.7–11.8<br>(10.1 $\pm$ 0.4)  | 3.3–4.3<br>(4.0 $\pm$ 0.1)   | 1                               | 26                           | –18.1                             | 10.2                         | 3.9                        |
| Small      | 2                                    | 27–49<br>(38.1 $\pm$ 16.1)   | –18.2– –17.9<br>(–18.1 $\pm$ 0.1) | 12.9–14.6<br>(13.8 $\pm$ 0.8) | 4.1–4.2<br>(4.18 $\pm$ 0.05) | 3                               | 27–37<br>(32.2 $\pm$ 2.9)    | –18.1– –17.5<br>(–17.8 $\pm$ 0.2) | 7.4–9.7<br>(8.9 $\pm$ 0.7)   | 3.0–3.9<br>(3.5 $\pm$ 0.2) |
| Medium     | 11                                   | 66–124<br>(55.3 $\pm$ 10.4)  | –18.4– –15.9<br>(–17.9 $\pm$ 0.4) | 6.6–11.1<br>(9.0 $\pm$ 0.3)   | 3.0–4.3<br>(3.7 $\pm$ 0.1)   | 1                               | 104                          | –17.8                             | 8.6                          | 3.8                        |
| Large      | 20                                   | 110–198<br>(132.6 $\pm$ 4.9) | –17.9– –15.8<br>(–16.6 $\pm$ 0.1) | 7.1–16.1<br>(11.9 $\pm$ 0.6)  | 3.0–4.3<br>(3.7 $\pm$ 0.1)   | 1                               | 120                          | –17.5                             | 7.8                          | 3.2                        |
| Stage      | All specimens, Normal                |                              |                                   |                               |                              | Atlantic specimens, OMZ         |                              |                                   |                              |                            |
|            | n                                    | ML, mm                       | $\delta^{13}\text{C}$ , ‰         | $\delta^{15}\text{N}$ , ‰     | TL                           | n                               | ML, mm                       | $\delta^{13}\text{C}$ , ‰         | $\delta^{15}\text{N}$ , ‰    | TL                         |
| All        | 55                                   | 6–152<br>(54.8 $\pm$ 14.9)   | –20.3– –16.5<br>(–18.4 $\pm$ 0.1) | 5.9–11.2<br>(8.1 $\pm$ 0.2)   | 3.1–4.3<br>(3.7 $\pm$ 0.04)  | 15                              | 7–133<br>(43.3 $\pm$ 11.4)   | –20.7– –16.3<br>(–17.7 $\pm$ 0.3) | 6.6–11.8<br>(9.5 $\pm$ 0.4)  | 3.3–4.3<br>(3.9 $\pm$ 0.1) |
| Paralarvae | 16                                   | 6–25<br>(18.5 $\pm$ 1.3)     | –20.3– –16.7<br>(–18.4 $\pm$ 0.3) | 7.1–10.1<br>(8.4 $\pm$ 0.3)   | 3.7–4.2<br>(3.9 $\pm$ 0.04)  | 10                              | 7–26<br>(15.5 $\pm$ 2.3)     | –20.7– –16.5<br>(–17.9 $\pm$ 0.4) | 7.7–11.8<br>(10.1 $\pm$ 0.4) | 3.3–4.3<br>(4.0 $\pm$ 0.1) |
| Small      | 19                                   | 27–63<br>(44.0 $\pm$ 2.6)    | –19.6– –16.5<br>(–18.3 $\pm$ 0.2) | 5.9–11.2<br>(8.2 $\pm$ 0.3)   | 3.2–4.3<br>(3.7 $\pm$ 0.1)   | 0                               | –                            | –                                 | –                            | –                          |
| Medium     | 14                                   | 66–93<br>(78.1 $\pm$ 2.3)    | –19.1– –17.6<br>(–18.5 $\pm$ 0.1) | 5.9–9.7<br>(7.4 $\pm$ 0.3)    | 3.3–4.0<br>(3.5 $\pm$ 0.05)  | 3                               | 70–89<br>(77.6 $\pm$ 6.0)    | –18.4– –17.4<br>(–17.9 $\pm$ 0.3) | 6.6–8.4<br>(7.7 $\pm$ 0.5)   | 3.3–3.7<br>(3.5 $\pm$ 0.1) |
| Large      | 6                                    | 105–152<br>(131.2 $\pm$ 6.9) | –19.6– –17.3<br>(–18.1 $\pm$ 0.4) | 8.1–9.2<br>(8.8 $\pm$ 0.2)    | 3.1–4.0<br>(3.5 $\pm$ 0.2)   | 2                               | 128–133<br>(130.9 $\pm$ 2.4) | –16.6– –16.3<br>(–16.5 $\pm$ 0.2) | 8.6–9.3<br>(8.9 $\pm$ 0.4)   | 3.5–4.2<br>(3.9 $\pm$ 0.3) |
| Stage      | Atlantic specimens, OLZ <sup>1</sup> |                              |                                   |                               |                              | Atlantic specimens, Normal      |                              |                                   |                              |                            |
|            | n                                    | ML, mm                       | $\delta^{13}\text{C}$ , ‰         | $\delta^{15}\text{N}$ , ‰     | TL                           | n                               | ML, mm                       | $\delta^{13}\text{C}$ , ‰         | $\delta^{15}\text{N}$ , ‰    | TL                         |



|            |                        |                          |                               |                           |                          |                           |                          |                                 |                           |                          |
|------------|------------------------|--------------------------|-------------------------------|---------------------------|--------------------------|---------------------------|--------------------------|---------------------------------|---------------------------|--------------------------|
| All        | 6                      | 26–120<br>(57.9 ± 17.4)  | –18.1– –17.5<br>(–17.8 ± 0.1) | 7.4–10.2<br>(8.9 ± 0.5)   | 3.0–3.9<br>(3.6 ± 0.2)   | 45                        | 6–105<br>(44.6 ± 4.0)    | –20.3– –16.7<br>(–18.4 ± 0.1)   | 5.9–10.1<br>(7.8 ± 0.2)   | 3.3–4.3<br>(3.8 ± 0.04)  |
| Paralarvae | 1                      | 26                       | –18.1                         | 10.2                      | 3.9                      | 16                        | 6–25<br>(18.5 ± 1.3)     | –20.3– –16.7<br>(–18.4 ± 0.3)   | 7.1–10.1<br>(8.4 ± 0.3)   | 3.7–4.2<br>(3.9 ± 0.04)  |
| Small      | 3                      | 27–37<br>(32.2 ± 2.9)    | –18.1– –17.5<br>(–17.8 ± 0.2) | 7.4–9.7<br>(8.9 ± 0.7)    | 3.0–3.9<br>(3.5 ± 0.2)   | 16                        | 27–63<br>(40.9 ± 2.3)    | –19.6– –17.0<br>(–18.4 ± 0.2)   | 5.9–9.4<br>(7.8 ± 0.3)    | 3.3–4.3<br>(3.8 ± 0.1)   |
| Medium     | 1                      | 104                      | –17.8                         | 8.6                       | 3.8                      | 12                        | 66–93<br>(79.3 ± 2.5)    | –19.1– –17.6<br>(–18.5 ± 0.1)   | 5.9–8.2<br>(7.1 ± 0.2)    | 3.3–4.0<br>(3.6 ± 0.1)   |
| Large      | 1                      | 120                      | –17.5                         | 7.8                       | 3.2                      | 1                         | 105                      | –17.3                           | 9.0                       | 3.8                      |
| Stage      | Pacific specimens, OMZ |                          |                               |                           |                          | Pacific specimens, Normal |                          |                                 |                           |                          |
|            | n                      | ML, mm                   | $\delta^{13}\text{C}$ , ‰     | $\delta^{15}\text{N}$ , ‰ | TL                       | n                         | ML, mm                   | $\delta^{13}\text{C}$ , ‰       | $\delta^{15}\text{N}$ , ‰ | TL                       |
| All        | 28                     | 27–198<br>(112.0 ± 6.8)  | –18.2– –15.8<br>(–16.8 ± 0.1) | 7.1–16.1<br>(12.1 ± 0.5)  | 3.0–4.3<br>(3.8 ± 0.1)   | 6                         | 61–152<br>(101.0 ± 15.2) | –19.6– –18.0<br>(–18.7 ± 0.2)   | 8.1–9.7<br>(8.9 ± 0.2)    | 3.1–3.4<br>(3.2 ± 0.05)  |
| Paralarvae | 0                      | –                        | –                             | –                         | –                        | 0                         | –                        | –                               | –                         | –                        |
| Small      | 2                      | 27–49<br>(38.1 ± 11.1)   | –18.2– –17.9<br>(–18.1 ± 0.1) | 12.9–14.6<br>(13.8 ± 0.8) | 4.1–4.2<br>(4.18 ± 0.05) | 1                         | 61                       | –18.5                           | 9.1                       | 3.2                      |
| Medium     | 8                      | 66–101<br>(83.8 ± 4.2)   | –17.6– –15.9<br>(–16.7 ± 0.2) | 7.4–13.5<br>(11.3 ± 0.9)  | 3.0–4.3<br>(3.7 ± 0.2)   | 2                         | 69–73<br>(70.9 ± 2.3)    | –18.7– –18.6<br>(–18.62 ± 0.05) | 9.1–9.7<br>(9.4 ± 0.3)    | 3.3–3.4<br>(3.35 ± 0.09) |
| Large      | 18                     | 110–198<br>(132.8 ± 5.4) | –17.9– –15.8<br>(–16.7 ± 0.1) | 7.1–16.1<br>(12.2 ± 0.7)  | 3.0–4.3<br>(3.7 ± 0.1)   | 3                         | 124–152<br>(134.2 ± 9.0) | –19.6– –18.0<br>(–18.7 ± 0.5)   | 8.1–8.8<br>(8.5 ± 0.2)    | 3.1–3.2<br>(3.17 ± 0.04) |

<sup>1</sup> all specimens from OLZ were sampled in the Atlantic.

Supplementary Fig. 1. Images of lower and upper beaks of *Vampyroteuthis infernalis* obtained from all ontogenetic stages. Lower beaks (side, oblique and facing views): A, paralarva (northeast Atlantic Ocean, Guinea, ML 13 mm); B, small (equatorial area of the Atlantic Ocean, ML 27 mm); C, medium (southwest Pacific Ocean, southeast Australia, ML 73 mm); D, large (central east Pacific Ocean, Peru, ML 139 mm). Upper beaks (side, oblique and top views): E, small (northeast Atlantic Ocean, Guinea, ML 27 mm); F, medium (central east Pacific Ocean, Ecuador), ML 85 mm); G, large (northeast Atlantic Ocean, Cape-Verde, ML 133 mm). Scale bars: 1 mm. All photos are original. Beak views terminology follows Lu & Ickeringill 2002.

**Lower beaks:**

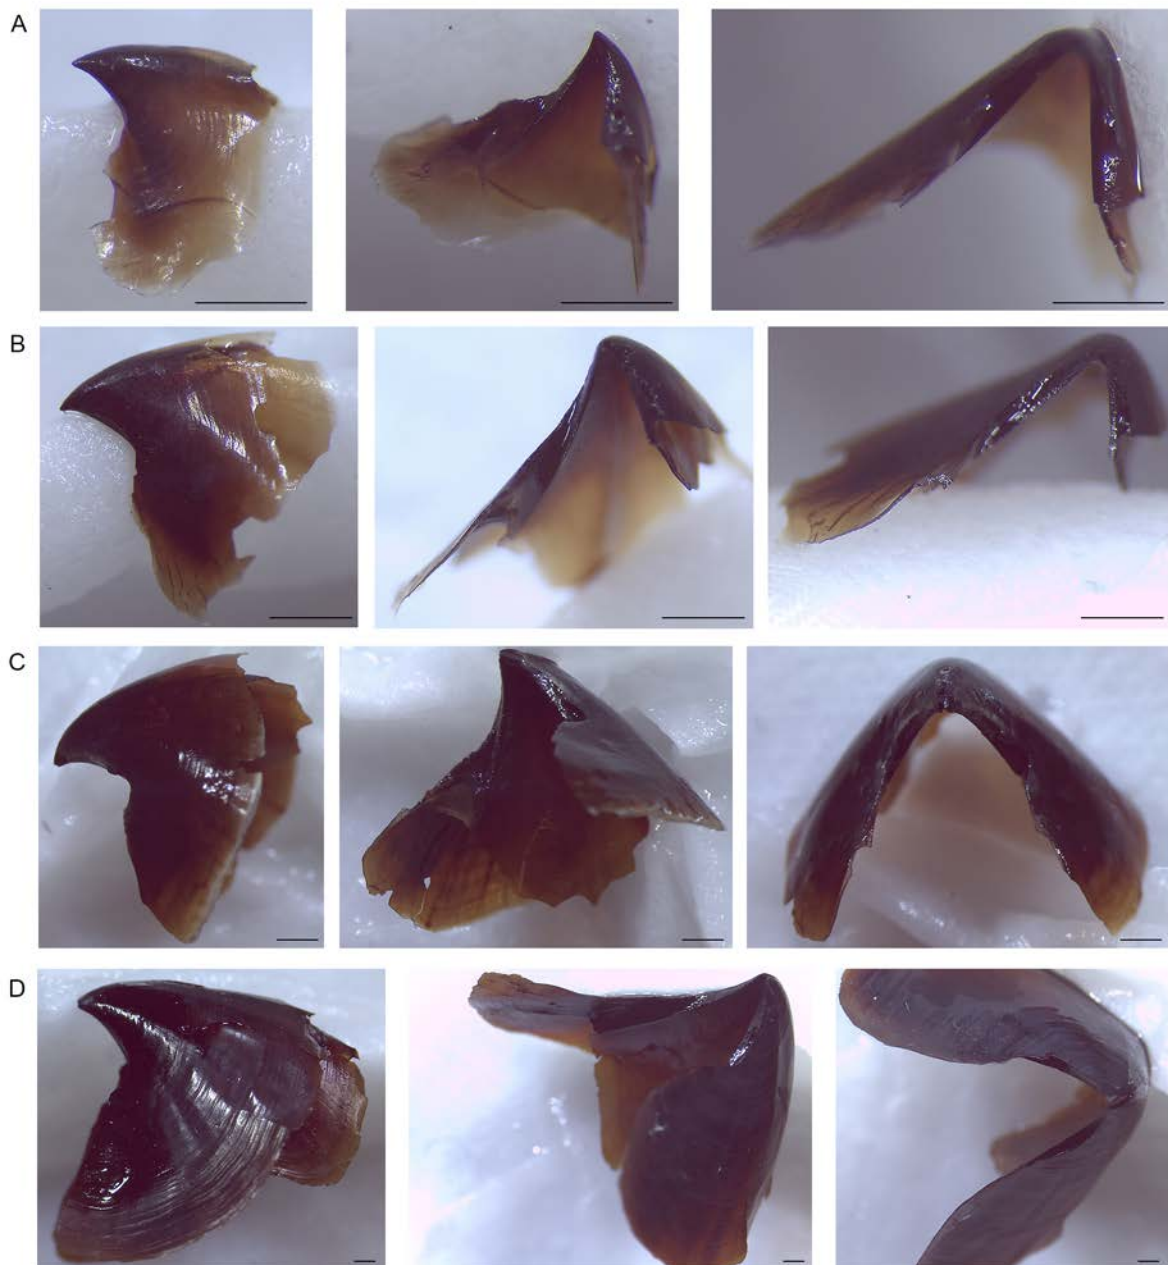

Upper beaks:

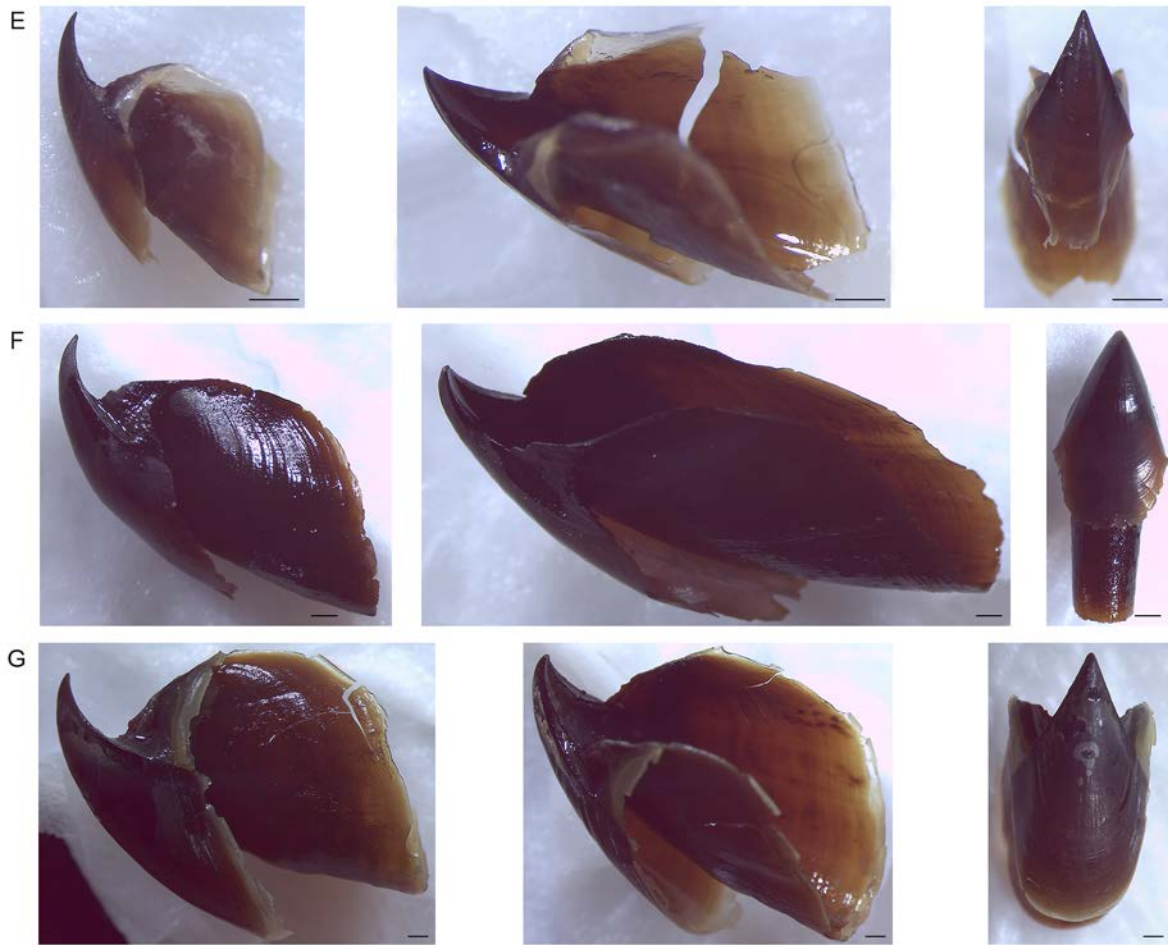

Cited literature:

Lu, C. C. & Ickeringill, R. Cephalopod beak identification and biomass estimation techniques: tools for dietary studies of southern Australian finfishes. *Mus. Vic. Sci. Rep.* **6**, 1–65 (2002)
